# Supplementary material for: Interaction of hydroxychloroquine with SARS-CoV2 functional proteins using all-atoms non-equilibrium alchemical simulations
Source: Royal Society of Chemistry journal article supplement (doi:10.1039/d0cc03558k), 2020-01-01
Supplement: d0cc03558k2.zip [file d0cc03558k2.zip]

# In Silico Predicted Toxic Properties

## Molecule Depiction

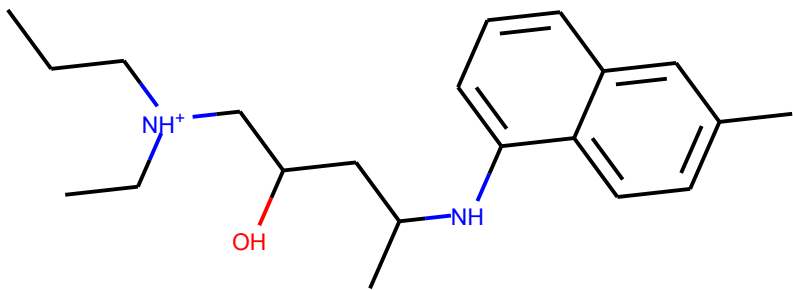

Mol

## Molecule properties:

| Property                   | Value |
|----------------------------|-------|
| Num Aliphatic Carbocycles  | 0     |
| Num Heteroatoms            | 3     |
| Num Hydrogen Bond Acceptor | 2     |
| Num Aromatic Carbocycles   | 2     |
| LogP                       | 3.014 |
| Num Rotatable Bonds        | 9     |
| Num Aromatic Heterocycles  | 0     |
| Num Lipinski HB Donor      | 3     |
| Num Atoms                  | 24    |
| Num Lipinski HB Acceptor   | 3     |
| Num Rings                  | 2     |
| Num Hydrogen bond Donor    | 3     |

| Property                   | Value   |
|----------------------------|---------|
| Num Aliphatic Rings        | 0       |
| Num Aliphatic Heterocycles | 0       |
| Num Heterocycles           | 0       |
| Mol Wt                     | 329.259 |
| Labute ASA                 | 146.231 |
| Num Aromatic Rings         | 2       |
| Topological Polar SA       | 36.7    |

## Potential Toxicity:

| Index | Action                                                                                                                                   | Injury       | Confidence | Similar active compound in database                                                  |
|-------|------------------------------------------------------------------------------------------------------------------------------------------|--------------|------------|--------------------------------------------------------------------------------------|
| 000   | Differential cytotoxicity (isogenic chicken DT40 cell lines)                                                                             | Genotoxicity | 0.994      | 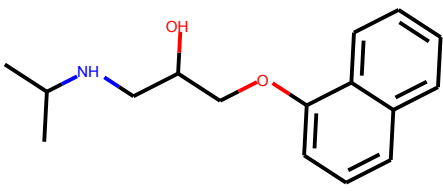   |
| 001   | Differential cytotoxicity (isogenic chicken DT40 Rev3 mutant cell line)                                                                  | Genotoxicity | 0.99       |  |
| 002   | Differential cytotoxicity against isogenic chicken DT40 cell lines with known DNA damage response pathways - Rad54/Ku70 mutant cell line | Genotoxicity | 0.994      |  |

## Toxic substructure:

| Index | Alert Name                     | Structure                                                                                                                                        |
|-------|--------------------------------|--------------------------------------------------------------------------------------------------------------------------------------------------|
| 000   | Alert from Top200 Drug         | 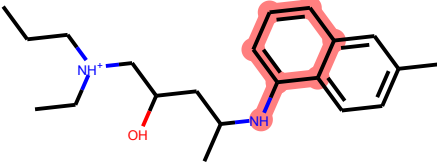<br><chem>CCN(CC)CC[C@H](O)CC[C@H](Nc1ccc2ccccc2c1C)C</chem>   |
| 001   | Potential electrophilic agents | <br><chem>CCN(CC)CC[C@H](O)CC[C@H](Nc1ccc2ccccc2c1C)C</chem>   |
| 002   | PatWalters                     | <br><chem>CCN(CC)CC[C@H](O)CC[C@H](Nc1ccc2ccccc2c1C)C</chem> |
| 003   | Covalent Bind With DNA         | <br><chem>CCN(CC)CC[C@H](O)CC[C@H](Nc1ccc2ccccc2c1C)C</chem> |

| Index | Alert Name                                | Structure                                                                            |
|-------|-------------------------------------------|--------------------------------------------------------------------------------------|
| 004   | Covalent Bind With DNA                    | 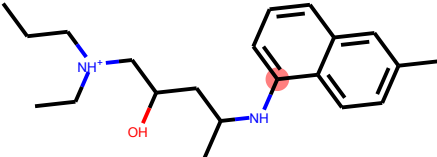   |
| 005   | Genotoxic carcinogenicity<br>mutagenicity |    |
| 006   | Hepatotoxicity                            |  |

### Download full prediction result:

[download \(/static/6850688SummaryTable.csv.gz\)](/static/6850688SummaryTable.csv.gz)

[Run another prediction \(/moltox\)](/moltox)

[Back](#)

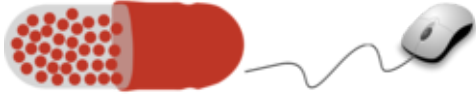

Page View: 75135    沪ICP备17025598号 (<http://www.miitbeian.gov.cn>)     (<http://opendefinition.org/okd>)

Best viewed using Chrome (<http://www.google.com/chrome>) on 1280x1024 resolution and above
