# Supplementary material for: Interaction of hydroxychloroquine with SARS-CoV2 functional proteins using all-atoms non-equilibrium alchemical simulations
Source: Royal Society of Chemistry journal article supplement (doi:10.1039/d0cc03558k), 2020-01-01
Supplement: d0cc03558k2.zip [file d0cc03558k2.zip]

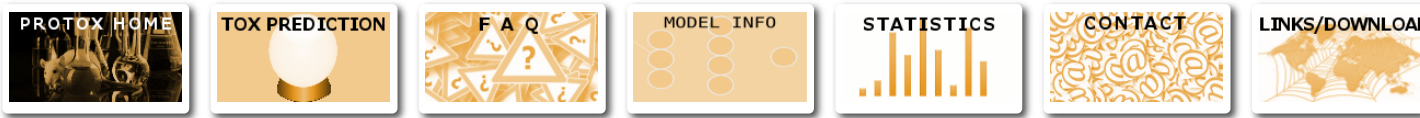

Oral toxicity prediction results for input compound

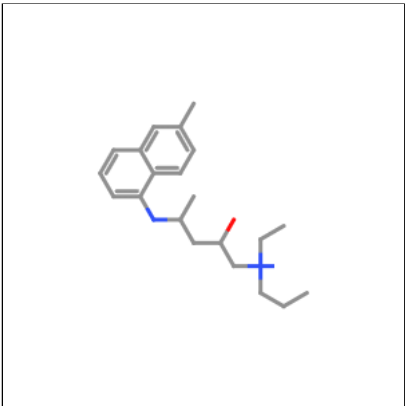

Predicted LD50: 1200mg/kg

Predicted Toxicity Class: 4

1

2

3

4

5

6

Average similarity: 66.06%

Prediction accuracy: 68.07%

20%40%60%80%

|                                   |                                  |
|-----------------------------------|----------------------------------|
| Name                              | CCC[NH+]<br>(CC)CC(O)CC(C)Nc1ccc |
| Molweight                         | 329.5                            |
| Number of hydrogen bond acceptors | 2                                |
| Number of hydrogen bond donors    | 1                                |
| Number of atoms                   | 25                               |
| Number of bonds                   | 26                               |
| Number of rings                   | 2                                |
| Number of rotatable bonds         | 9                                |
| Total charge                      | 1                                |
| Molecular Polar Surface Area      | 36.7                             |

Comparison of input compound with dataset compounds

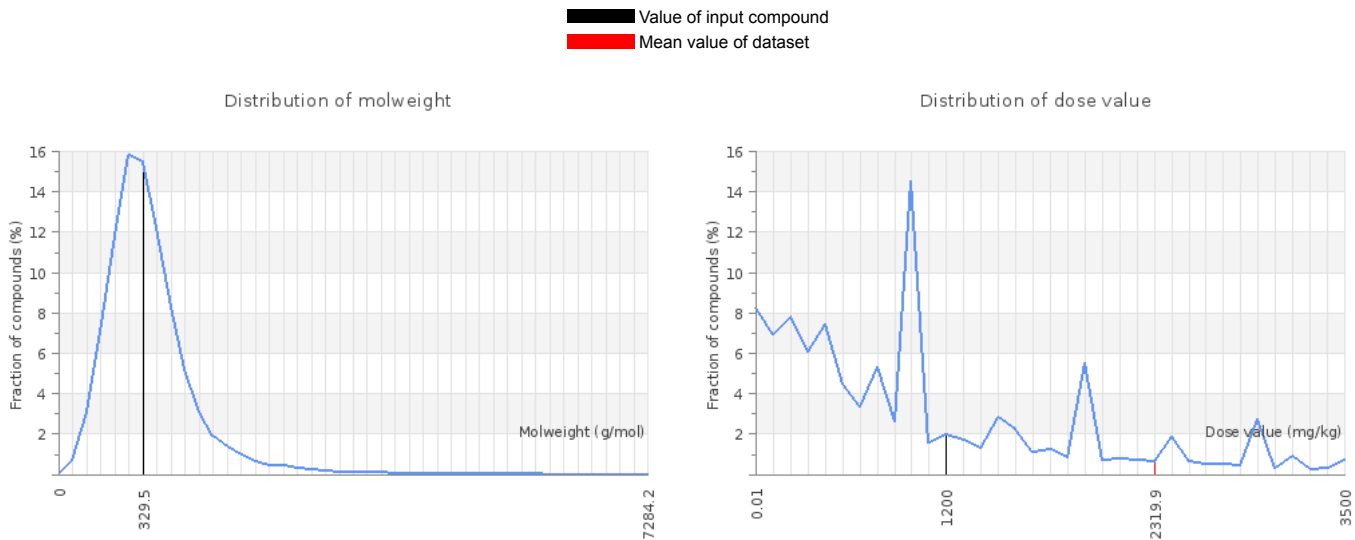

+

Similar compounds

Toxicity Model Report

| Classification                             | Target                                           | Shorthand    | Prediction     | Probability    |
|--------------------------------------------|--------------------------------------------------|--------------|----------------|----------------|
| Organ toxicity                             | Hepatotoxicity                                   | dili         | Not Calculated | Not Calculated |
| Toxicity end points                        | Carcinogenicity                                  | carcino      | Not Calculated | Not Calculated |
| Toxicity end points                        | Immunotoxicity                                   | immuno       | Not Calculated | Not Calculated |
| Toxicity end points                        | Mutagenicity                                     | mutagen      | Not Calculated | Not Calculated |
| Toxicity end points                        | Cytotoxicity                                     | cyto         | Not Calculated | Not Calculated |
| Tox21-Nuclear receptor signalling pathways | Aryl hydrocarbon Receptor (AhR)                  | nr_ahr       | Not Calculated | Not Calculated |
| Tox21-Nuclear receptor signalling pathways | Androgen Receptor (AR)                           | nr_ar        | Not Calculated | Not Calculated |
| Tox21-Nuclear receptor signalling pathways | Androgen Receptor Ligand Binding Domain (AR-LBD) | nr_ar_lbd    | Not Calculated | Not Calculated |
| Tox21-Nuclear receptor signalling pathways | Aromatase                                        | nr_aromatase | Not Calculated | Not Calculated |
| Tox21-Nuclear receptor signalling pathways | Estrogen Receptor Alpha (ER)                     | nr_er        | Not Calculated | Not Calculated |
| Tox21-Nuclear receptor signalling pathways | Estrogen Receptor Ligand Binding Domain (ER-LBD) | nr_er_lbd    | Not Calculated | Not Calculated |

|                                            |                                                                                       |               |                |                |
|--------------------------------------------|---------------------------------------------------------------------------------------|---------------|----------------|----------------|
| Tox21-Nuclear receptor signalling pathways | Peroxisome Proliferator Activated Receptor Gamma (PPAR-Gamma)                         | nr_ppar_gamma | Not Calculated | Not Calculated |
| Tox21-Stress response pathways             | Nuclear factor (erythroid-derived 2)-like 2/antioxidant responsive element (nrf2/ARE) | sr_are        | Not Calculated | Not Calculated |
| Tox21-Stress response pathways             | Heat shock factor response element (HSE)                                              | sr_hse        | Not Calculated | Not Calculated |
| Tox21-Stress response pathways             | Mitochondrial Membrane Potential (MMP)                                                | sr_mmp        | Not Calculated | Not Calculated |
| Tox21-Stress response pathways             | Phosphoprotein (Tumor Suppressor) p53                                                 | sr_p53        | Not Calculated | Not Calculated |
| Tox21-Stress response pathways             | ATPase family AAA domain-containing protein 5 (ATAD5)                                 | sr_atad5      | Not Calculated | Not Calculated |

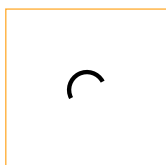

The toxicity radar chart is intended to quickly illustrate the confidence of positive toxicity results compared to the average of its class. Click the thumbnail to access the plot once it has finished loading.

## Toxicity targets

Possible binding to toxicity targets is shown below. For more information on the targets, please click on the individual abbreviations.

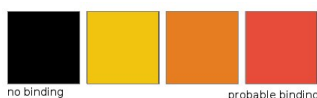

|                       |                       |                      |                      |                       |                      |                      |                      |                     |                      |                       |                      |                      |                       |                      |                      |
|-----------------------|-----------------------|----------------------|----------------------|-----------------------|----------------------|----------------------|----------------------|---------------------|----------------------|-----------------------|----------------------|----------------------|-----------------------|----------------------|----------------------|
| <a href="#">AA2AR</a> | <a href="#">ADRB2</a> | <a href="#">ANDR</a> | <a href="#">AOFA</a> | <a href="#">CRFR1</a> | <a href="#">DRD3</a> | <a href="#">ESR1</a> | <a href="#">ESR2</a> | <a href="#">GCR</a> | <a href="#">HRH1</a> | <a href="#">NR1I2</a> | <a href="#">OPRK</a> | <a href="#">OPRM</a> | <a href="#">PDE4D</a> | <a href="#">PGH1</a> | <a href="#">PRGR</a> |
|                       |                       |                      |                      |                       |                      |                      |                      |                     |                      |                       |                      |                      |                       |                      |                      |

Last updated: March 2020

Disclaimer: Compound structures submitted will not be released under any circumstances. This work is licensed under a [Creative Commons Attribution-Noncommercial License](#).
